# Supplementary material for: Pharmacometabolomics Informs About Pharmacokinetic Profile of Methylphenidate
Source: PubMed Central journal article supplement — CPT Pharmacometrics Syst Pharmacol. 2018 Aug 31;7(8):525–33. doi: 10.1002/psp4.12309 (PMC6118295; doi:10.1002/psp4.12309), 2018-08-31
Supplement: PSP4-7-525-s005.pdf [file PSP4-7-525-s005.pdf]

**TG(56:5) Group 1 vs Group 3**

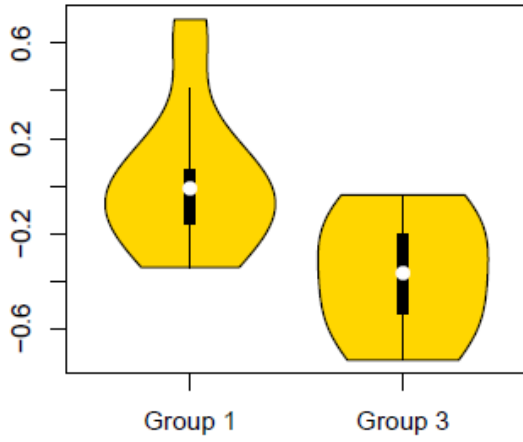

**TG(56:6) Group 1 vs Group 3**

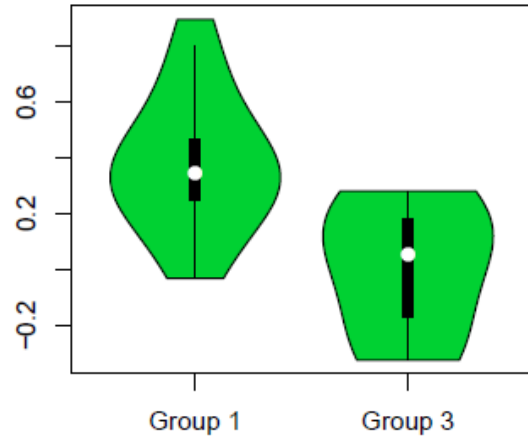

**PC(38:5) Group 1 vs Group 3**

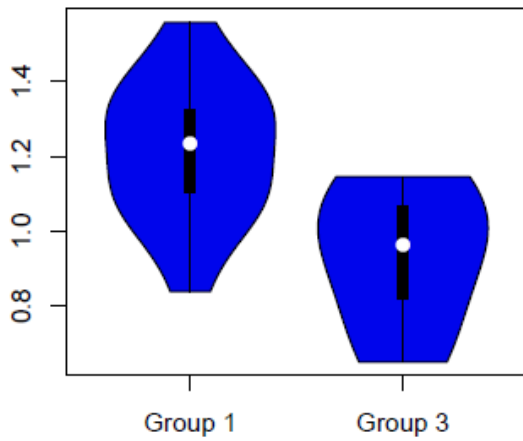

Figure S2: Violin plots representing the distribution of values for the significant lipids for group 1 subjects and group 3 subjects as shown in table 3.
