# Supplementary figures and images for: Pharmacometabolomics Informs About Pharmacokinetic Profile of Methylphenidate
Source: PubMed Central journal article supplement — CPT Pharmacometrics Syst Pharmacol. 2018 Aug 31;7(8):525–33. doi: 10.1002/psp4.12309 (PMC6118295; doi:10.1002/psp4.12309), 2018-08-31

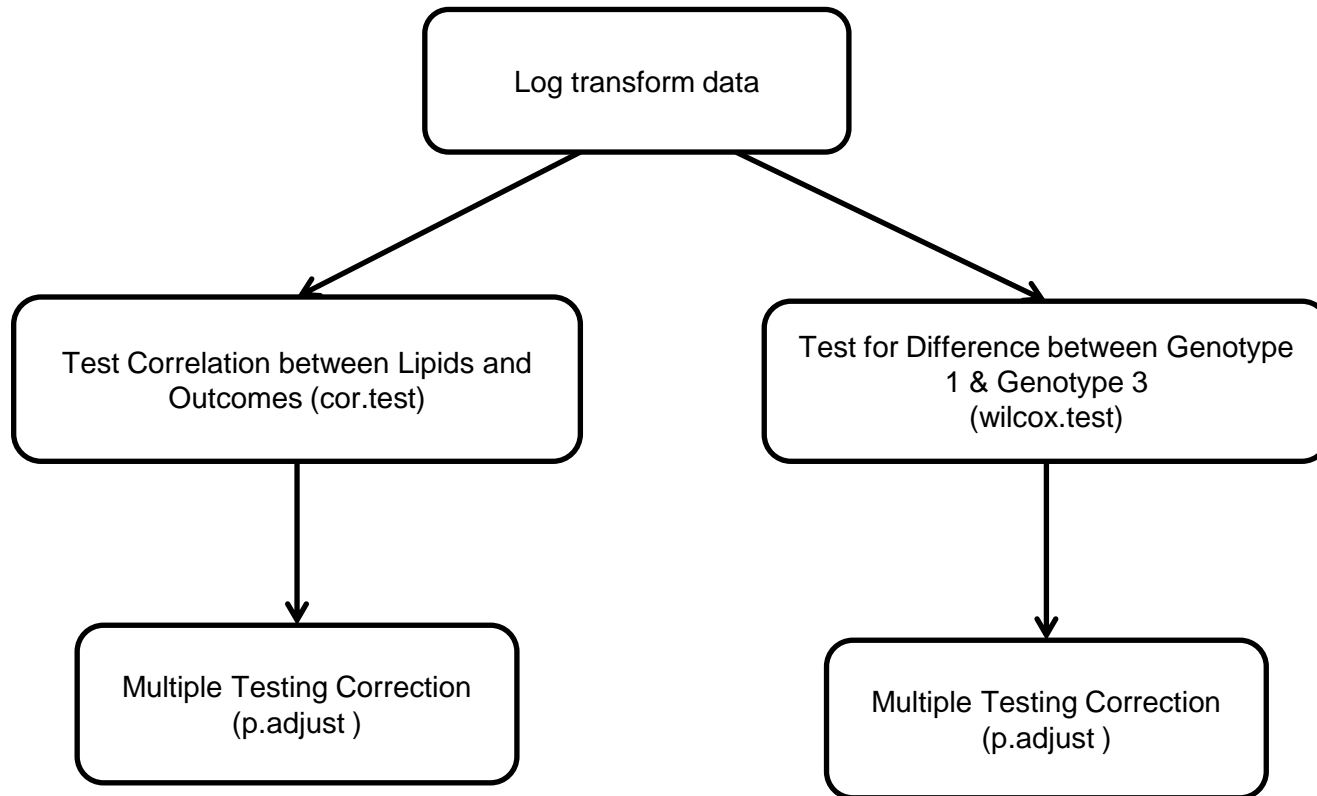

Figure S3: Diagram of the flow for the statistical tests

Supplement: PSP4-7-525-s006.pdf [file PSP4-7-525-s006.pdf]
